1 **Title**

2 Mitochondrial type II NADH dehydrogenase of *Plasmodium falciparum* is dispensable and not the functional target of  
3 putative NDH2 quinolone inhibitors

4 **Running title:** PfNDH2 in *Plasmodium falciparum*

5 Hangjun Ke<sup>1\*</sup>, Suresh M. Ganesan<sup>1</sup>, Swati Dass<sup>1</sup>, Joanne M. Morrisey<sup>1</sup>, Sovitj Pou<sup>2</sup>, Aaron Nilsen<sup>2</sup>, Michael K. Riscoe<sup>2</sup>,  
6 Michael W. Mather<sup>1</sup>, Akhil B. Vaidya<sup>1</sup>

7 <sup>1</sup>Center for Molecular Parasitology, Department of Microbiology and Immunology, Drexel University College of  
8 Medicine, Philadelphia, PA 19129, USA

9 <sup>2</sup>Portland VA Medical Center, 3710 SW US Veterans Hospital Road, Portland, OR 97239, USA

10 \*Correspondence to: Hangjun Ke (hk84@drexel.edu)

11  
12  
13

14

15

16

17

18

19

20

21

22

## 23 **Abstract**

24 The battle against malaria has been substantially impeded by the recurrence of drug resistance in *Plasmodium falciparum*,  
25 the deadliest human malaria parasite. To counter the problem, novel antimalarial drugs are urgently needed, especially  
26 those that target unique pathways of the parasite, since they are less likely to have side effects. The mitochondrial type II  
27 NADH dehydrogenase of *P. falciparum*, PfNDH2 (PF3D7\_0915000), has been considered a good prospective  
28 antimalarial drug target for over a decade, since malaria parasites lack the conventional multi-subunit NADH  
29 dehydrogenase, or Complex I, present in the mammalian mitochondrial electron transport chain (mtETC). Instead,  
30 Plasmodium parasites contain a single subunit NDH2, which lacks proton pumping activity and is absent in humans. A  
31 significant amount of effort has been expended to develop PfNDH2 specific inhibitors, yet the essentiality of PfNDH2 has  
32 not been convincingly verified. Herein, we knocked out PfNDH2 in *P. falciparum* via a CRISPR/Cas9 mediated  
33 approach. Deletion of PfNDH2 does not alter the parasite's susceptibility to multiple mtETC inhibitors, including  
34 atovaquone and ELQ-300. We also show that the antimalarial activity of the fungal NDH2 inhibitor HDQ and its new  
35 derivative CK-2-68 is due to inhibition of the parasite cytochrome *bc<sub>1</sub>* complex rather than PfNDH2. These compounds  
36 directly inhibit the ubiquinol-cytochrome *c* reductase activity of the malarial *bc<sub>1</sub>* complex. Our results call into question  
37 the validity of PfNDH2 as an antimalarial drug target.

## 38 **Importance**

39 For a long time, PfNDH2 has been considered an attractive antimalarial drug target. However, the conclusion that  
40 PfNDH2 is essential was based on preliminary and incomplete data. Here we generate a PfNDH2 KO (knockout) parasite  
41 in the blood stages of *Plasmodium falciparum*, showing that the gene is not essential. We also show that previously  
42 reported PfNDH2-specific inhibitors kill the parasites primarily via targeting the cytochrome *bc<sub>1</sub>* complex, not PfNDH2.  
43 Overall, we provide genetic and biochemical data that help to resolve a long-debated issue in the field regarding the  
44 potential of PfNDH2 as an antimalarial drug target.

45

46

47

## 48 **Introduction**

49 The mitochondrial electron transport chain (mtETC) is an important, validated drug target in malaria parasites. The  
50 mtETC is the primary generator of the electrochemical gradient across the mitochondrial inner membrane. In the asexual  
51 blood stages of malaria parasites, however, the only critical function of the mtETC is the continuous reoxidation of  
52 ubiquinol to sustain dihydroorotate dehydrogenase (DHODH) activity, which is required for de novo pyrimidine  
53 biosynthesis (1). In contrast, in insect stages, mitochondrial oxidative phosphorylation appears to have increased  
54 importance (2), likely requiring an intact central carbon metabolism (3) and increased mtETC activity to maintain the  
55 electrochemical gradient that drives ATP synthesis. For decades, the mtETC of malaria parasites has attracted major drug  
56 development efforts (4), ultimately resulting in antimalarials for clinical use and in preclinical/clinical stages of  
57 development. Malarone<sup>TM</sup>, a combination of atovaquone and proguanil, has been used clinically since 2000. Recent drug  
58 development efforts focused on the parasite DHODH led to the clinical candidate DSM265, which is currently undergoing  
59 Phase II clinical trials (5, 6). ELQ-300, an inhibitor of the Qi site of the *bc<sub>1</sub>* complex (Complex III), has also reached  
60 preclinical development (7, 8). This underscores that the essential protein components of the parasite mtETC are attractive  
61 antimalarial drug targets.

62 In the parasite mtETC, there are five dehydrogenases that donate electrons to ubiquinone producing ubiquinol (reduced  
63 ubiquinone), which is subsequently oxidized by the *bc<sub>1</sub>* complex (Complex III). These five enzymes include NDH2,  
64 malate quinone oxidoreductase (MQO), DHODH, glycerol 3-phosphate dehydrogenase (G3PDH), and succinate  
65 dehydrogenase (SDH). As mentioned above, the parasite DHODH is a validated antimalarial drug target. NDH2 has also  
66 been considered a promising antimalarial drug target for over a decade (9-12). In general, NADH dehydrogenase is a  
67 membrane bound flavoenzyme that catalyzes electron transfer from NADH to quinone producing NAD<sup>+</sup> and quinol. In  
68 human mitochondria, a type I NADH dehydrogenase (Complex I) has 45 subunits and pumps protons across the  
69 mitochondrial inner membrane concomitant with electron transfer (13). Mutations of Complex I subunits are responsible  
70 for a significant portion of hereditary human respiratory chain disorders (14). In contrast, malaria parasites lack the  
71 conventional multi-subunit Complex I. Instead, they have a type II NADH dehydrogenase (NDH2), which is a single  
72 subunit, non-proton pumping protein, likely attaching to the mitochondrial inner membrane and facing the mitochondrial  
73 matrix. *Toxoplasma gondii*, another apicomplexan parasite, has two isoforms of NDH2, which both face the mitochondrial

74 matrix, catalyzing oxidation of mitochondrial NADH (15). NDH2 is also present in bacteria (16), fungi (17) and plants  
75 (18), but not in humans or other mammals.

76  
77 The absence of NDH2 in humans suggests that the parasite enzyme might be a good antimalarial drug target (9-12). In  
78 1990, Fry and Beesley first measured NADH oxidation activities in isolated mitochondria of malaria parasites (*P. yoelii*  
79 and *P. falciparum*) using two spectrophotometric methods (19). Briefly, in the first assay, NADH oxidation was coupled  
80 to cytochrome *c* reduction and changes of cytochrome *c* absorption spectrum were measured at a wavelength of 550 nm;  
81 in the second assay, NADH oxidation produced NAD<sup>+</sup>, directly leading to a reduced absorption at 340 nm. Using these  
82 measurements, Fry and Beesley found that NADH oxidation in the mitochondrial samples was more robust than that of  
83 other substrates and was not inhibited by rotenone, a classical Complex I inhibitor. The conclusion was that mitochondria  
84 of malaria parasites were able to oxidize NADH, although it was not clear which specific enzyme(s) were responsible or  
85 which pathway(s) were involved. In 2006, Biagini *et al.* also observed significant NADH oxidation activity (direct assay  
86 at 340 nm) in *P. falciparum* extracts (9). Biagini *et al.* used atovaquone and potassium cyanide to block the activities of  
87 Complexes III and IV individually, leading them to conclude that the observed NADH oxidation was due to PfNDH2 (9).  
88 However, with the use of total cell extracts containing various NADH dependent enzymes, it seems questionable to  
89 attribute all the observed NADH oxidation activity to PfNDH2 alone (9, 12). Coincidentally at that time, the ubiquinone  
90 analogue HDQ (1-hydroxy-2-dodecyl-4(1H) quinolone) was found to be a potent inhibitor of the fungal NDH2 in  
91 *Yarrowia lipolytica* (20). Later HDQ was shown to be highly effective against *P. falciparum* and *T. gondii* parasites (10).  
92 Based on these results (9, 10, 12), it became widely accepted that PfNDH2 could be an attractive antimalarial drug target.  
93 As a result, a significant drug discovery campaign based on high throughput screening was undertaken to seek HDQ-like  
94 inhibitors to specifically inhibit PfNDH2 (21-23), yielding the lead compound, CK-2-68 (22). Recently, the crystal  
95 structure of PfNDH2 was resolved via x-ray crystallization (24), which could further encourage drug development efforts  
96 towards PfNDH2 using approaches based on in silico docking and structure activity relationships of PfNDH2 inhibitors.

97  
98 The rationale for targeting PfNDH2 for antimalarial drug development has, however, been controversial (25, 26). The  
99 fact that the entire mtETC in asexual blood stages could be functionally bypassed by expression of the heterologous  
100 yDHODH from *Saccharomyces cerevisiae* to support pyrimidine biosynthesis in the presence of mtETC inhibition raised

101 the likelihood that PfDHODH is the only essential enzyme among the five mitochondrial dehydrogenases that donate  
102 electrons to ubiquinone (1). The yDHODH transgenic parasites can be grown continuously under a high atovaquone  
103 pressure (100 nM) (1, 27). Under such conditions, the *bc<sub>1</sub>* complex is fully inhibited, which prevents the reoxidation of  
104 ubiquinol by the mtETC and, therefore, should block the turnover of all subsequent quinone-dependent dehydrogenases,  
105 implying that PfNDH2, as well as PfG3PDH, PfMQO, and PfSDH, are not required for growth. Interestingly, drug  
106 development research towards PfNDH2 inhibitors did not appear to slow down (21-23) after these results were reported  
107 (25), nor even when the type II NADH dehydrogenase in the rodent malaria parasite *P. berghei*, PbNDH2, was genetically  
108 ablated in 2011 (28). Very recently, selection of resistant *P. falciparum* parasites by treatment with CK-2-68 and RYL-  
109 552, reported “PfNDH2 specific” inhibitors, generated mutations in the mtDNA encoded *cyt b* locus, while no mutations  
110 were found in PfNDH2 (29); these data strongly suggests that CK-2-68 and RYL-552 exert their antimalarial activity by  
111 inhibiting the parasite *bc<sub>1</sub>* complex, not PfNDH2, in contrast to previous suggestions (21-23). However, in the absence of  
112 specific genetic data on the essentiality of PfNDH2, the importance of PfNDH2 in *P. falciparum* has not been settled  
113 definitively.

114  
115 Here, we successfully knocked out PfNDH2 in *P. falciparum* using a CRISPR/Cas9 based approach, which should put to  
116 rest the question of the validity of PfNDH2 as an antimalarial drug target. We found that deletion of PfNDH2 did not alter  
117 the parasite’s susceptibility to major mtETC inhibitors and, further, that HDQ and CK-2-68 kill malaria parasites by  
118 directly inhibiting the parasite cytochrome *bc<sub>1</sub>* complex.

## 119 120 **Materials and Methods**

121 1. Parasite maintenance and transfection. *P. falciparum* D10 is the wildtype (WT) parasite line used in this study.  
122 D10attB-yDHODH was generated previously (27), which expresses the yeast DHODH gene of *Saccharomyces cerevisiae*.  
123 Parasites were cultured with RPMI 1640 medium (Invitrogen by Thermo Fisher Scientific) supplemented with 5g/L  
124 Albumax I (Invitrogen), 10 mg/L hypoxanthine, 2.1 g/L sodium bicarbonate, HEPES (15 mM), and gentamycin (50  
125 µg/ml). Cultures were maintained in human red blood cells (Type O, Interstate Blood Bank, Tennessee) and kept in a  
126 CO<sub>2</sub>/O<sub>2</sub> incubator filled with a low oxygen mixture (5% O<sub>2</sub>, 5% CO<sub>2</sub>, and 90% N<sub>2</sub>). Ring stage parasites with 5%  
127 parasitemia were electroporated with plasmid DNA in cytomix buffer using a Bio-Rad gene pulser. Drug medium was

128 added 48 h post electroporation. For *hdhfr* (human dihydrofolate dehydrogenase) selectable marker, 5 nM WR99210 was  
129 used.

130

131 2. Plasmid construction.

132 1) Removal of *yDHODH* from the pAIO pre-gRNA construct. The pre-gRNA construct pAIO was generously provided  
133 by Dr. Josh Beck (30); the plasmid contains *yDHODH* and *Streptococcus pyogenes* Cas9 coding sequences (CDS)  
134 connected by a 2A “self-cleaving” peptide. To remove *yDHODH*, pAIO was digested with BamHI and BglII to release  
135 the entire sequence of *yDHODH* and the first 250 bp of Cas9, since there is no unique restriction site between the two  
136 genes that could be used to release the *yDHODH* CDS alone. The first 250 bp of Cas9 were amplified from the original  
137 pAIO vector with primers P1 and P2, which include short homologous sequences that match the ends of the pAIO vector  
138 after its digestion with BamHI and BglII. The PCR product and the digested vector were then joined together using  
139 NEBuilder® HiFi DNA Assembly (New England Biolabs®, Inc). A colony PCR was performed to screen colonies using  
140 primers P1 and P2. Positive clones were grown up, and their plasmid DNAs were digested with BamHI and BglII to  
141 confirm the loss of *yDHODH*. The positive plasmids were then sequenced using a primer upstream of Cas9 (P3) to  
142 confirm the intactness of Cas9. These procedures yielded the pre\_gRNA construct without *yDHODH*, namely pAIO-  
143 *yDHODH*(-).

144 2) PfNDH2 KO construct. PfNDH2 (PF3D7\_0915000) is 1602 bp long with no introns. We cloned the 5' and 3'  
145 homologous regions of PfNDH2 into a pCC1 vector bearing the *hdhfr* selectable marker (31). The 5'HR (934 bp) was  
146 amplified with primers P4 and P5 and cloned into pCC1 digested by NcoI and EcoRI. Subsequently, the 3'HR (936 bp)  
147 was amplified with primers P6 and P7 and cloned into the vector digested by SpeI and SacII. After cloning, both 5'HR  
148 and 3'HR were sequenced (Genewiz LLC). The KO construct was named 5'3'PfNDH2\_pCC1. Maxi prep DNA of  
149 5'3'PfNDH2\_pCC1 (Qiagen) was digested with HincII overnight to linearize the vector before transfections.

150 3) Guide RNA constructs. The sequence between the 5'HR and 3'HR of PfNDH2 (490 bp) was submitted to the gRNA  
151 design tool (<http://grna.ctegd.uga.edu/>) to seek potential gRNAs. From the list of candidates, three sequences were chosen  
152 based on their high scores and zero off-target predictions. For each of these sequences, a pair of complementary  
153 oligonucleotides (60 or 61 bp) was synthesized and annealed in a mixture of NEB Buffers 2 and 4 by heating to 95°C for  
154 5 minutes, then slowly cooling to room temperature. The vector, pAIO-*yDHODH*(-), was digested with BtgZI and joined

155 with the annealed oligonucleotide pair by gene assembly (New England Biolabs®, Inc), yielding a pAIO-yDHODH(-)-  
156 gRNA construct. Other gRNA cloning procedures followed our published protocol (32).  
157 Primers used for cloning procedures are listed below.  
158 P1 (Remove yDHODH-F), 5'- ATACCTAATAGAAATATATCAGGATCCAAAAATGGACAAGAAGTACAGCATCG;  
159 P2 (Remove yDHODH-R), 5'- CCATCTCGTTGCTGAAGATC;  
160 P3 (Remove yDHODH-chk), 5'- GTATATTTTAAACTAGAAAAGGAATAAC;  
161 P4 (KO-5fF), 5'- GACCATGGATATCAAAAAATAATGCAGTAAAATGC;  
162 P5 (KO-5fR), 5'- CCGAATTCTGAACCTAGGATTATAATCTTTTCTTTTC;  
163 P6 (KO-3fF), 5'- CTA CTAGTGTCTGAAGTTACCGCAGAATTTG;  
164 P7 (KO-3fR), 5'- AACCGCGGTCTTAATAAAAATCGATGAAAAAATGGAACC;  
165 P8 (gRNA1-F), 5'- CATATTAAGTATATAATATTgAATGTACCACTACATAAACAGTTTTAGAGCTAGAAATAGC;  
166 P9 (gRNA1-R), 5'- GCTATTTCTAGCTCTAAAACCTGTTTATGTAGTGGTACATTcAATATTATATACTTAATATG;  
167 P10 (gRNA2-F), 5'- CATATTAAGTATATAATATTgCATGTAGCTGTTGTAGGAGGGTTTTAGAGCTAGAAATAGC;  
168 P11 (gRNA2-R), 5'- GCTATTTCTAGCTCTAAAACCTCCTACAACAGCTACATGcAATATTATATACTTAATATG;  
169 P12 (gRNA3-F), 5'- CATATTAAGTATATAATATTgTTATTTAATTATAGCTGTAGGTTTTAGAGCTAGAAATAGC;  
170 P13 (gRNA3-R), 5'- GCTATTTCTAGCTCTAAAACCTACAGCTATAATTTAAATAAcAATATTATATACTTAATATG;  
171 P14 (gRNA1-N20), 5'- AATGTACCACTACATAAACA;  
172 P15 (gRNA2-N20), 5'- CATGTAGCTGTTGTAGGAGG;  
173 P16 (gRNA3-N20), 5'- TTATTTAATTATAGCTGTAG;  
174 P17 (N20CheckR), 5'- ATATGAATTACAAATATTGCATAAAGA;  
175 P18 (5fchk), 5'- GAACTATACATCTATAAAGCATTAC;  
176 P19 (3fchk), 5'- GAAAAAAGAAGCACATATATATATAT;  
177 P20 (hDHFR-F), 5'- ATGCATGGTTCGCTAAACTGCATC;  
178 P21 (hDHFR-R), 5'-ATCATTCTTCTCATATACTTCAAATTTGTAC.

179

180 3. Assessing parasite growth. PfNDH2 KO and D10 WT lines were synchronized several times by alanine (0.5 M, pH 7.6  
181 with 10 mM HEPES) treatment. On day 0, parasites were inoculated into a 24 well plate with each well containing 2.5 ml  
182 of culture at 1% parasitemia and 3% hematocrit. Cultures were fed daily and split every two days. At each split (1:5), a  
183 sample of the parasitized RBCs was pelleted and fixed with 4% paraformaldehyde at 4°C overnight. After all samples  
184 were collected and fixed, they were washed with 1x PBS and stained with SYBR green I at 1:1000 (Catalog S7567, Life  
185 technologies by ThermoFisher Scientific). The samples were washed with PBS three times and analyzed on a C6 Flow

186 Cytometer (BD). A total of 250,000 events were collected for each sample. Unstained infected RBCs and stained  
187 uninfected RBCs served as negative controls for gating. Growth curves were drawn using Graphpad Prism 6.

188

189 4. Growth inhibition assays using  $^3\text{H}$ -hypoxanthine incorporation. Inhibitor compounds were diluted by a series of three-  
190 fold dilutions in 96 well plates in low hypoxanthine medium (2.5 mg/L). Parasites were washed three times with low  
191 hypoxanthine medium, supplemented with fresh blood sufficient to make 1% parasitemia and re-suspended in the proper  
192 volume of low hypoxanthine medium to make a suspension with 3% hematocrit. Aliquots of the diluted culture were  
193 added to the 96-well plates containing the inhibitor dilution series. After 24 h incubation, 10  $\mu\text{l}$  of 0.5  $\mu\text{Ci}$   $^3\text{H}$ -  
194 hypoxanthine was added to each well and the plates were incubated for another 24 h. After a total of 48 h incubation, the  
195 parasites were lysed by freezing-and-thawing, and nucleic acids were collected onto a filter using a cell harvester (Perkin  
196 Elmer). Radioactivity was counted using a Topcount scintillation counter (Perkin Elmer). Data were analyzed and graphed  
197 using Graphpad Prism 6.

198

199 5. Ubiquinol-cytochrome *c* reduction assay. Mitochondria of  $\Delta\text{PfNDH2}$  and D10 WT were individually isolated using a  
200 method published previously (32, 33). Briefly, a large volume of parasite culture of each line (~2 liter) was lysed with  
201 saponin (0.05%) and disrupted in a  $\text{N}_2$  cavitation chamber (Parr 4639 Cell Disruption Bomb) in an isotonic mitochondrial  
202 medium. The total parasite lysate was spun down at 900 *g* for 6 min to remove large debris, and the cloudy supernatant  
203 was passed through a MACS CS column (Miltenyi Biotec) in a Vario MACS magnetic separation apparatus to remove  
204 most of the hemozoin. The eluted light yellow material was pelleted at 23,000  $\times g$  for 20 min at 4  $^\circ\text{C}$ , and the pellet was  
205 re-suspended in buffer and stored at -80  $^\circ\text{C}$ . The cytochrome *c* reductase activity of the *bc*<sub>1</sub> complex was measured with a  
206 modification of previous methods (32-34). The assay volume was 300  $\mu\text{l}$ , containing mitochondrial proteins (~5-10  $\mu\text{l}$   
207 mitochondrial preparation), 100  $\mu\text{M}$  decylubiquinol, 75  $\mu\text{M}$  horse heart cytochrome *c* (Sigma-Aldrich), 0.1 mg/ml n-  
208 docecyl- $\beta$ -D-maltoside, 60 mM HEPES (pH 7.4), 10 mM sodium malonate, 1 mM EDTA, and 2 mM KCN, and was  
209 incubated at 35 $^\circ\text{C}$  in a stirred cuvette. Reduction of horse heart cytochrome *c* was recorded at 550 nm with a CLARITY  
210 VF integrating spectrophotometer (OLIS, Bogart, GA). A Bio-Rad colorimetric assay was used to measure protein  
211 concentrations of all mitochondrial samples.



212 6. NADH-cytochrome *c* reductase assay. Assay conditions were similar to those described above for the ubiquinol-  
213 cytochrome *c* reduction assay. The 300  $\mu$ L assay mix contained 5-10  $\mu$ l of mitochondrial proteins, 50  $\mu$ M horse heart  
214 cytochrome *c*, 60 mM HEPES (pH 7.4), 10 mM sodium malonate, 1 mM EDTA, 2 mM KCN and 300  $\mu$ M NADH. The  
215 assay buffer contained no detergent, since it was reported that detergents heavily interfere with assays of NADH oxidation  
216 (35).

## 217 **Results**

### 218 **PfNDH2 is not essential in asexual blood stages of *Plasmodium falciparum*.**

219 Transcriptomics data indicate that the type II NADH dehydrogenase in *P. falciparum* (PF3D7\_0915000) is expressed in  
220 the asexual blood stages (PlasmoDB.org). It has been shown that the leader sequence of PfNDH2 was able to target GFP  
221 into the mitochondrion (36), suggesting that PfNDH2 is a mitochondrial enzyme. To further confirm that, we genetically  
222 tagged PfNDH2 with 3x HA and the tagged PfNDH2 was localized to the parasite mitochondrion by immunofluorescence  
223 assays (37). To assess the essentiality of PfNDH2, we employed the CRISPR/Cas9 DNA repair technique. A KO plasmid  
224 vector was constructed (Figure 1A, Materials and Methods), containing a 5'HR (homologous region) mostly upstream of  
225 the gene's coding sequence (CDS) (outside) and a 3'HR near the end of the CDS (inside). The 3'HR was chosen from the  
226 coding region to circumvent inclusion of overly high AT content in the KO vector. Three gRNA sequences targeting the  
227 PfNDH2 gene were individually cloned into a modified pre-gRNA-Cas9 plasmid construct, from which yDHODH had  
228 been removed (Materials and Methods). Previous studies have shown that expression of yDHODH in malaria parasites  
229 renders the entire mtETC nonessential by providing a metabolic bypass for pyrimidine biosynthesis (1). Therefore, to  
230 assess the essentiality of PfNDH2 in the context of a normal mtETC, we removed yDHODH from the gRNA vectors. The  
231 KO plasmid was linearized by restriction digestion and transfected into D10 parasites together with the three circular  
232 gRNA vectors (Materials and Methods). Viable transgenic parasites were observed under WR99210 selection three weeks  
233 post transfection. As shown in Figure 1B, a diagnostic PCR revealed that PfNDH2 was disrupted. We then tightly  
234 synchronized both  $\Delta$ PfNDH2 and WT lines and examined the growth rates over 4 intraerythrocytic developmental cycles  
235 (IDCs) via flow cytometry. As shown in Figure 1C,  $\Delta$ PfNDH2 and WT parasites grew equally well over this time period.  
236 The  $\Delta$ PfNDH2 KO line was further maintained in culture for over one month, and no growth defects were noticeable (data  
237 not shown). Deletion of PfNDH2 also did not appear to affect parasite health and morphology (Figure 1D). Collectively,  
238

our data indicate that PfNDH2 is not essential in asexual blood stages of *P. falciparum*, consistent with the KO study carried out previously in the rodent malaria parasite, *P. berghei* (28). These results argue against the long-held assumption that PfNDH2 is an attractive drug target (9-12).

### **The $\Delta$ PfNDH2 parasite is equally susceptible to mtETC inhibitors.**

The healthy growth of the  $\Delta$ PfNDH2 parasites *in vitro* (Figure 1) suggests that the parasite mtETC remains functionally competent in the absence of PfNDH2. To challenge the KO parasites, we exposed them to mtETC inhibitors in growth inhibition assays, measured as  $^3\text{H}$ -hypoxanthine incorporation. As shown in Figure 2, in comparison to the WT, the  $\Delta$ PfNDH2 parasites were equally sensitive to atovaquone (a  $\text{Q}_o$  site inhibitor of the  $bc_1$  complex) and ELQ-300 (a  $\text{Q}_i$  site inhibitor) (8). Thus, these data suggest that deletion of PfNDH2 has little effect on the sensitivity of asexual parasites to downstream inhibitors of the mtETC. The loss of NDH2, thus, does not appear to affect the function of the remainder of the mtETC. As noted previously, HDQ and its newer derivative CK-2-68 were considered to be PfNDH2 specific inhibitors (21-23) or, more recently, dual-targeting inhibitors of cytochrome  $bc_1$  as well as PfNDH2 (38). In that case, HDQ and CK-2-68 would be expected to lose potency in the  $\Delta$ PfNDH2 parasite, since the putative primary target is absent. However, HDQ and CK-2-68 were still highly potent in the KO parasite (Figure 2), suggesting that HDQ and CK-2-68 primarily target another site than PfNDH2.

### **The $bc_1$ complex of the mtETC is the target of HDQ and CK-2-68.**

Our data above suggests that HDQ and CK-2-68 target an activity other than PfNDH2 (Figure 2). Since HDQ and CK-2-68 are ubiquinone analogs, we suggest that they kill malaria parasites by targeting the  $bc_1$  complex, although Vallieres *et al.* and Biagini *et al.* previously suggested that HDQ and CK-2-68 had a dual effect on both PfNDH2 and the  $bc_1$  complex (38, 39). To distinguish between these alternatives, we performed growth inhibition assays in the yDHODH transgenic parasite line using HDQ and CK-2-68 in combination with proguanil. As shown previously, expression of the yDHODH gene bypasses the need for mtETC function in asexual parasites (1). The yDHODH transgenic parasites have become a handy tool to examine whether a compound targets the mtETC, as all mtETC inhibitors suffer a large loss of potency in the yDHODH background, which applies to both  $bc_1$  inhibitors and PfDHODH inhibitors (40). Further, a low concentration of proguanil (1  $\mu\text{M}$ ) can restore sensitivity to  $bc_1$  inhibitors in yDHODH transgenic parasites (1), but not for

PfDHODH inhibitors. As a control, we showed that yDHODH parasites were fully resistant to atovaquone but became fully sensitive in the presence of 1  $\mu$ M proguanil (Figure 3). Upon inhibition by atovaquone, the yDHODH parasites lose their primary source of  $\Delta\Psi_m$  generation, conveyed by the *bc<sub>1</sub>* complex and cytochrome *c* oxidase of the mtETC, and become hypersensitive to proguanil, which targets a secondary generator of  $\Delta\Psi_m$  (1). Using this system, we tested the HDQ and CK-2-68 sensitivity of the yDHODH parasites with and without 1  $\mu$ M proguanil. As shown in Figure 3, yDHODH parasites were highly resistant to HDQ and CK-2-68, as expected; upon proguanil treatment, the yDHODH parasites regained sensitivity to these compounds. HDQ and CK-2-68, thus, behaved in a very similar manner to atovaquone against the yDHODH transgenic parasites, indicating that HDQ and CK-2-68 target the *bc<sub>1</sub>* complex. These results are consistent with a previous report that found that parasites grow normally in the presence of 10  $\mu$ M HDQ when expressing the yDHODH gene (41). Furthermore, recent chemical mutagenesis experiments using CK-2-68 generated mutations that were all in the *cyt b* locus, rather than in PfNDH2 (29). Collectively, these results indicate that HDQ and CK-2-68 are potent cytochrome *bc<sub>1</sub>* inhibitors.

#### **HDQ and CK-2-68 directly inhibit the enzymatic activity of the *bc<sub>1</sub>* complex.**

In addition to growth inhibition assays as described above (Figures 2 and 3), we also directly investigated the effect of HDQ and CK-2-68 on the enzymatic activity of the *bc<sub>1</sub>* complex in a preparation enriched in parasite mitochondria using a spectrophotometric assay (Materials and Methods) (33). As shown in Figure 4, HDQ and CK-2-68 inhibited the ubiquinol-cytochrome *c* reductase activity in the mitochondria of  $\Delta$ PfNDH2 and WT in a dose dependent manner. Importantly, the inhibitory potency of HDQ and CK-2-68 were equally robust in two types of mitochondria from WT and  $\Delta$ PfNDH2, respectively. This provides further evidence that the antimalarial mode of action of HDQ and CK-2-68 arises from inhibition of the *bc<sub>1</sub>* complex, rather than PfNDH2.

#### **In vitro measured NADH linked cytochrome *c* reductase activity is likely non-biological.**

Previously data from Fry and Beesley (19) revealed a relatively strong NADH-cytochrome *c* reductase activity in parasite mitochondrial preparations. Interestingly, the activity was not inhibited by rotenone (80  $\mu$ M) or antimycin A (a Qi inhibitor at 20  $\mu$ M) (19). Rotenone insensitivity suggested that malaria parasites lack a conventional multi-subunit Complex I, which was later interpreted as evidence that the type II NADH dehydrogenase was essential (9). While

293 antimycin A did not inhibit the NADH-cytochrome *c* reductase activity in Fry and Beesley's mitochondrial preparations,  
294 it did inhibit the cytochrome *c* reductase activity when other mitochondrial substrates were used, such as  $\alpha$ -  
295 glycerophosphate and succinate (19). In addition, antimycin A kills malaria parasites in whole cell assays with an EC<sub>50</sub> of  
296 13 nM (42). Thus, the provenance of the apparent NADH-cytochrome *c* reductase activity observed in mitochondrial  
297 preparations has been an unsettled issue. In intact parasites, NADH oxidized by NDH2 is presumed to pass electrons to  
298 ubiquinone, which are then transferred on to the *bc*<sub>1</sub> complex, cytochrome *c*, cytochrome *c* oxidase and, finally, to O<sub>2</sub>. If  
299 the *in vitro* assay were replicating the initial steps of the *in vivo* pathway, we should observe a much diminished NADH-  
300 cytochrome *c* reductase activity in the  $\Delta$ PfNDH2 parasites since PfNDH2, missing in the knockout parasite, is the only  
301 known enzyme donating electrons from NADH to the mtETC in the parasites (15). As shown in Figure 5, however,  
302 deletion of PfNDH2 had no effect on NADH-cytochrome *c* reductase activity, suggesting that this *in vitro* assay is likely  
303 non-physiological. Further, in both  $\Delta$ PfNDH2 and WT mitochondria, NADH-cytochrome *c* reductase activity was not  
304 inhibited by a mix of malaria parasite specific *bc*<sub>1</sub> inhibitors, including atovaquone (62 nM), ELQ-300 (62 nM), and HDQ  
305 (3,100 nM), each at equal or greater than 100x EC<sub>50</sub> (Figure 5). Thus, our data are consistent with the earlier observation  
306 that antimycin A failed to inhibit the NADH-cytochrome *c* reductase assay (19) and suggest that the *in vitro* NADH-  
307 cytochrome *c* reductase activity is likely non-enzymatic (see Discussion).  
308

## 309 Discussion

310 A common strategy for developing antimicrobial drugs is to target divergent proteins of the microbe to circumvent  
311 potential toxicity against the host. Proteins unique to microbes are even more interesting as their inhibitors would  
312 potentially have little to no side effects in the host. The type II NADH dehydrogenase is present in malaria parasites but  
313 not in humans; thus, it has been considered an attractive prospective drug target for a long time (9, 11, 43). However, a  
314 unique protein may not necessarily be an essential one. A valid drug target should normally be essential to the pathogen in  
315 order that its inhibition will arrest growth and/or kill the pathogen. Initial failures to disrupt the NDH2 gene in *P.*  
316 *falciparum* parasites suggested that the gene might be essential (35, 37). On the other hand, data on the effect of mtETC  
317 inhibitors in yDHODH transgenic parasites (1) and the reported knockout of NDH2 in *P. berghei* (28) suggested that  
318 PfNDH2 should be dispensable in asexual parasites (as described above). Without conclusive data, however, it remains a  
319 long-debated issue in the field whether PfNDH2 is a good antimalarial drug target. In this report, we have provided strong

evidence indicating that PfNDH2 is dispensable in asexual blood stages and, therefore, is unlikely to be an effective antimalarial drug target. We note that our knockout result is consistent with the recent genetic screen of *P. falciparum* growth phenotypes, in which a PiggyBac transposon insertion was recovered in the CDS of PfNDH2, suggesting non-essentiality of the gene (44).

Our results suggest that the parasite mtETC is functionally intact in the absence of PfNDH2. Not only is the growth of the KO line closely similar to that of the WT parental line (Figure 1C), but the response to cytochrome *bc<sub>1</sub>* inhibitors is virtually identical (Figure 2). Evidently, in the  $\Delta$ PfNDH2 parasites, the other ubiquinone-dependent dehydrogenases—MQO, SDH, G3PDH, and DHODH—supply sufficient ubiquinol to maintain adequate function of the mtETC during asexual development. DHODH is essential for the parasite's pyrimidine de novo synthesis pathway, since malaria parasites cannot salvage pyrimidine precursors; the other dehydrogenases, however, may be functionally redundant as electron donors to the mtETC. We have previously carried out a comprehensive genetic and biochemical study in the TCA cycle of *P. falciparum* (3). In the asexual blood stages, the main carbon source of the TCA is glutamine, rather than glucose. KDH (alpha-ketoglutarate dehydrogenase) is the entry point of glutamine derived carbons into the TCA cycle. KDH converts alpha-ketoglutarate to succinyl-CoA, with the concomitant reduction of NAD<sup>+</sup> to NADH, and it is likely that KDH is the principal producer of NADH in the mitochondrial matrix due to a relatively large TCA flux observed with labeled glutamine (3). Yet, neither KDH nor the TCA flux contributed by glutamine is essential to the parasite in asexual blood stages, which is consistent with the non-essential nature of PfNDH2 as a consumer of NADH.

Although HDQ and CK-2-68, and probably other related derivatives (29) do not primarily target PfNDH2 in parasites, as shown by our results, they are potent antimalarial compounds via inhibition of the parasite *bc<sub>1</sub>* complex. Importantly, HDQ and CK-2-68 retained their potency in atovaquone resistant parasites (38, 39). Experiments with yeast *cyt b* mutants suggested that HDQ likely bound to the Qi site of *bc<sub>1</sub>* complex, whereas atovaquone is a Qo site inhibitor (38). CK-2-68, on the other hand, is likely to be a Qo site inhibitor, but, nevertheless, exhibited no cross resistance with atovaquone (29). Biagini *et al.* have developed additional quinolone derivatives with more favorable pharmacological properties that were predicted to bind at the Qo site (39). Combinations of non-cross resistant *bc<sub>1</sub>* inhibitors may be effective at slowing the development and spread of resistance, since strong resistance mutations in *cyt b* may exert a significant survival fitness

347 cost (45), including blocking transmission (46). Thus, the development of additional antimalarial candidates targeting the  
348 *bc<sub>1</sub>* complex may facilitate the future development of effective combination therapies. Indeed, atovaquone and ELQ-300,  
349 Q<sub>o</sub> and Q<sub>i</sub> inhibitors respectively, were recently shown to be a highly effective and synergistic antimalarial combination  
350 (47).

351  
352 The results of our attempts to measure *in vitro* NADH-cytochrome *c* reductase activity spectrophotometrically provide a  
353 cautionary tale for the design and interpretation of assays involving the oxidation of NADH, a reactive reductant. Neither  
354 elimination of PfNDH2 nor strong inhibition of the cytochrome *c* reductase activity of *bc<sub>1</sub>* affected the observed reaction  
355 (Fig. 5), implying that the reaction does not proceed through the mtETC. Fry and Beasley apparently observed the same  
356 phenomenon when they measured apparent NADH-cytochrome *c* reductase activity in *Plasmodium* mitochondria with and  
357 without antimycin A, a general Q<sub>i</sub> site inhibitor of the *bc<sub>1</sub>* complex (19). Given the report that detergents (which form  
358 micelles) accelerate NADH oxidation (35), we speculate that it may be the presence of mitochondrial phospholipid  
359 membranes in the mitochondrial samples that produce this effect. Cytochrome *c* is known to bind to phospholipids head  
360 groups (48), so mitochondrial particles could provide a surface that concentrates cytochrome *c* for reaction with NADH (a  
361 trimolecular reaction, requiring 2 cytochromes *c* to oxidize one NADH, as it is a 2-electron reductant). The non-enzymatic  
362 reaction may also be facilitated by the relatively high concentration of cytochrome *c* used in spectrophotometric assays  
363 (50-100 μM). At any rate, our results demonstrate that the apparent robust NADH-cytochrome *c* activity that has been  
364 reported in *Plasmodium* mitochondrial preparations *in vitro* is not an indication of high NADH dehydrogenase activity in  
365 intact parasites.

## 366 367 **Figure legend**

368 **Figure 1. Disruption of the type II NADH dehydrogenase of *P. falciparum* does not affect growth in asexual blood**  
369 **stages.** (A) A schematic diagram depicts the genetic deletion of a large segment of PfNDH2 via CRISPR/Cas9-assisted  
370 homologous recombination. (B) A diagnostic PCR confirming the genotype of the ΔPfNDH2 parasite. Primer positions  
371 are shown in (A). In ΔPfNDH2, a 4.1 kb knockout band (Lane 1), a 2.2 kb 5' integration band (Lane 4) and a 2.5 kb 3'  
372 integration band (Lane 7) were detected. In WT, only a 2.5 kb band was detected (Lane 2) whereas no 5' integration (Lane  
373 5) or 3' integration (Lane 8) was observed. Lanes 3, 6, and 9 were negative controls with no DNA in PCR reactions. (C) A

374 growth curve of the  $\Delta$ PfNDH2 parasite determined by SYBR green staining and flow cytometry analysis (Materials and  
375 Methods). (D) The  $\Delta$ PfNDH2 parasite is morphologically healthy. Giemsa stained thin smears of WT and  $\Delta$ PfNDH2  
376 cultures are shown displaying schizont and ring forms.

377 **Figure 2. Deletion of PfNDH2 does not affect sensitivity to mitochondrial electron transport chain inhibitors.**  $^3$ H-  
378 hypoxanthine incorporation assays were performed in the  $\Delta$ PfNDH2 and WT parasites challenged with atovaquone (A),  
379 ELQ-300 (B), HDQ (C) and CK-2-68 (D). Data shown is a representative of  $n \geq 3$  replicates.

380 **Figure 3. HDQ and CK-2-68 target the  $bc_1$  complex.** D10attB-yDHODH transgenic parasites were challenged with  
381 atovaquone (A), HDQ (B) and CK-2-68 (C) with and without proguanil (1  $\mu$ M). Growth was measured using  $^3$ H-  
382 hypoxanthine incorporation assays. With an  $EC_{50}$  of  $\sim 60$   $\mu$ M, 1  $\mu$ M of proguanil had no effect on WT parasites (1).

383 **Figure 4. HDQ and CK-2-68 directly inhibit mitochondrial ubiquinol-cytochrome  $c$  reductase activity *in vitro*.** In  
384 each measurement, the same amount of mitochondria of KO or WT (10  $\mu$ l of sample) was used. Reduction of cytochrome  
385  $c$  was followed spectrophotometrically at 550 nm (Materials and Methods). The rates of reduction in the presence of  
386 various concentrations of inhibitors were normalized to that of no drug controls (average of 4-5 replicates), resulting in  
387 relative activity (%). (A) Inhibition by HDQ. Data shown is plotted from  $n=3$  biological replicates. (B) Inhibition by CK-  
388 2-8. Data shown is plotted from  $n=2$  biological replicates.

389 **Figure 5. NADH-linked cytochrome  $c$  reductase activity in the *in vitro* assay is not dependent on PfNDH2 or**  
390 **mtETC.** In each measurement, 10  $\mu$ l of mitochondrial sample was used. Rates of cytochrome reduction were measured  
391 without and with addition of  $bc_1$  inhibitors (atovaquone (62 nM), ELQ-300 (62 nM) and HDQ (3,100 nM)). Data shown is  
392 mean  $\pm$  s.d. of  $n=3$  replicates.

### 393 Acknowledgements

394 We thank Dr. Kristin D. Lane and Dr. Thomas E. Wellems of NIH/NIAID for kindly providing the CK-2-68 compound.  
395 The Cas9-gRNA construct was generously provided by Dr. Josh R. Beck (now at Iowa State University) and Dr. Daniel E.  
396 Goldberg from Washington University St. Louis. This research was supported by an NIH grant (ABV, R01 AI028398)  
397 and an NIH K22 award (HK, K22 AI127702). MKR receives grants from NIH (R01, AI100569), Veterans Affairs Merit  
398 Review Program Award (i01 BX003312) and DOD (Log# PR130649; Contract # W81XWH-14-1-0447).

399 **Conflict of Interest.** The authors declare that they have no conflicts of interest with the contents of this article.

400  
401 **Author contribution statements.**

402 HK and ABV designed the outline of the project. HK produced the PfNDH2 KO parasite and characterized its genotypes  
403 and phenotypes. SMG made the KO construct. SD and MWM measured NADH cytochrome *c* reductase activities *in vitro*.  
404 JMM performed growth inhibition assays. SP, AN and MKR synthesized HDQ and ELQ-300. HK wrote the manuscript  
405 which was modified by all other authors.

406  
407 **Reference**

- 408 1. Painter HJ, Morrisey JM, Mather MW, Vaidya AB. 2007. Specific role of mitochondrial electron transport in  
409 blood-stage Plasmodium falciparum. Nature 446:88-91.
- 410 2. Sturm A, Mollard V, Cozijnsen A, Goodman CD, McFadden GI. 2015. Mitochondrial ATP synthase is dispensable  
411 in blood-stage Plasmodium berghei rodent malaria but essential in the mosquito phase. Proc Natl Acad Sci U S A  
412 112:10216-23.
- 413 3. Ke H, Lewis IA, Morrisey JM, McLean KJ, Ganesan SM, Painter HJ, Mather MW, Jacobs-Lorena M, Llinas M,  
414 Vaidya AB. 2015. Genetic investigation of tricarboxylic acid metabolism during the Plasmodium falciparum life  
415 cycle. Cell Rep 11:164-74.
- 416 4. Ke H, Mather MW. 2017. Targeting mitochondrial functions as antimalarial regime, what is next? Curr Clin Micro  
417 Rpt 4:175-191.
- 418 5. Phillips MA, Lotharius J, Marsh K, White J, Dayan A, White KL, Njoroge JW, El Mazouni F, Lao Y, Kokkonda S,  
419 Tomchick DR, Deng X, Laird T, Bhatia SN, March S, Ng CL, Fidock DA, Wittlin S, Lafuente-Monasterio M, Benito FJ,  
420 Alonso LM, Martinez MS, Jimenez-Diaz MB, Bazaga SF, Angulo-Barturen I, Haselden JN, Louttit J, Cui Y, Sridhar A,  
421 Zeeman AM, Kocken C, Sauerwein R, Dechering K, Avery VM, Duffy S, Delves M, Sinden R, Ruecker A, Wickham  
422 KS, Rochford R, Gahagen J, Iyer L, Riccio E, Mirsalis J, Bathurst I, Rueckle T, Ding X, Campo B, Leroy D, Rogers  
423 MJ, et al. 2015. A long-duration dihydroorotate dehydrogenase inhibitor (DSM265) for prevention and  
424 treatment of malaria. Sci Transl Med 7:296ra111.
- 425 6. Llanos-Cuentas A, Casapia M, Chuquiyaui R, Hinojosa JC, Kerr N, Rosario M, Toovey S, Arch RH, Phillips MA,  
426 Rozenberg FD, Bath J, Ng CL, Cowell AN, Winzeler EA, Fidock DA, Baker M, Mohrle JJ, Hooft van Huijsduijnen R,  
427 Gobeau N, Araeipour N, Andenmatten N, Ruckle T, Duparc S. 2018. Antimalarial activity of single-dose DSM265,  
428 a novel plasmodium dihydroorotate dehydrogenase inhibitor, in patients with uncomplicated Plasmodium  
429 falciparum or Plasmodium vivax malaria infection: a proof-of-concept, open-label, phase 2a study. Lancet Infect  
430 Dis 18:874-883.
- 431 7. Nilsen A, LaCrue AN, White KL, Forquer IP, Cross RM, Marfurt J, Mather MW, Delves MJ, Shackleford DM, Saenz  
432 FE, Morrisey JM, Steuten J, Mutka T, Li Y, Wirjanata G, Ryan E, Duffy S, Kelly JX, Sebayang BF, Zeeman AM,  
433 Noviyanti R, Sinden RE, Kocken CHM, Price RN, Avery VM, Angulo-Barturen I, Jimenez-Diaz MB, Ferrer S,  
434 Herreros E, Sanz LM, Gamo FJ, Bathurst I, Burrows JN, Siegl P, Guy RK, Winter RW, Vaidya AB, Charman SA, Kyle  
435 DE, Manetsch R, Riscoe MK. 2013. Quinolone-3-diarylethers: a new class of antimalarial drug. Sci Transl Med  
436 5:177ra37.
- 437 8. Nilsen A, Miley GP, Forquer IP, Mather MW, Katneni K, Li Y, Pou S, Pershing AM, Stickles AM, Ryan E, Kelly JX,  
438 Doggett JS, White KL, Hinrichs DJ, Winter RW, Charman SA, Zakharov LN, Bathurst I, Burrows JN, Vaidya AB,  
439 Riscoe MK. 2014. Discovery, synthesis, and optimization of antimalarial 4(1H)-quinolone-3-diarylethers. J Med  
440 Chem 57:3818-34.



- 441 9. Biagini GA, Viriyavejakul P, O'Neill P M, Bray PG, Ward SA. 2006. Functional characterization and target  
442 validation of alternative complex I of Plasmodium falciparum mitochondria. *Antimicrob Agents Chemother*  
443 50:1841-51.
- 444 10. Saleh A, Friesen J, Baumeister S, Gross U, Bohne W. 2007. Growth inhibition of *Toxoplasma gondii* and  
445 *Plasmodium falciparum* by nanomolar concentrations of 1-hydroxy-2-dodecyl-4(1H)quinolone, a high-affinity  
446 inhibitor of alternative (type II) NADH dehydrogenases. *Antimicrob Agents Chemother* 51:1217-22.
- 447 11. Mogi T, Matsushita K, Murase Y, Kawahara K, Miyoshi H, Ui H, Shiomi K, Omura S, Kita K. 2009. Identification of  
448 new inhibitors for alternative NADH dehydrogenase (NDH-II). *FEMS Microbiol Lett* 291:157-61.
- 449 12. Fisher N, Bray PG, Ward SA, Biagini GA. 2007. The malaria parasite type II NADH:quinone oxidoreductase: an  
450 alternative enzyme for an alternative lifestyle. *Trends Parasitol* 23:305-10.
- 451 13. Senkler J, Senkler M, Braun HP. 2017. Structure and function of complex I in animals and plants - a comparative  
452 view. *Physiol Plant* 161:6-15.
- 453 14. Vafai SB, Mootha VK. 2012. Mitochondrial disorders as windows into an ancient organelle. *Nature* 491:374-83.
- 454 15. Lin SS, Gross U, Bohne W. 2011. Two internal type II NADH dehydrogenases of *Toxoplasma gondii* are both  
455 required for optimal tachyzoite growth. *Mol Microbiol* 82:209-21.
- 456 16. Sellamuthu S, Singh M, Kumar A, Singh SK. 2017. Type-II NADH Dehydrogenase (NDH-2): a promising therapeutic  
457 target for antitubercular and antibacterial drug discovery. *Expert Opin Ther Targets* 21:559-570.
- 458 17. de Vries S, Grivell LA. 1988. Purification and characterization of a rotenone-insensitive NADH:Q6 oxidoreductase  
459 from mitochondria of *Saccharomyces cerevisiae*. *Eur J Biochem* 176:377-84.
- 460 18. Michalecka AM, Svensson AS, Johansson FI, Agius SC, Johanson U, Brennicke A, Binder S, Rasmusson AG. 2003.  
461 *Arabidopsis* genes encoding mitochondrial type II NAD(P)H dehydrogenases have different evolutionary origin  
462 and show distinct responses to light. *Plant Physiol* 133:642-52.
- 463 19. Fry M, Beesley JE. 1991. Mitochondria of mammalian *Plasmodium* spp. *Parasitology* 102 Pt 1:17-26.
- 464 20. Eschemann A, Galkin A, Oettmeier W, Brandt U, Kerscher S. 2005. HDQ (1-hydroxy-2-dodecyl-4(1H)quinolone), a  
465 high affinity inhibitor for mitochondrial alternative NADH dehydrogenase: evidence for a ping-pong mechanism.  
466 *J Biol Chem* 280:3138-42.
- 467 21. Pidathala C, Amewu R, Pacorel B, Nixon GL, Gibbons P, Hong WD, Leung SC, Berry NG, Sharma R, Stocks PA,  
468 Srivastava A, Shone AE, Charoensutthivarakul S, Taylor L, Berger O, Mbekeani A, Hill A, Fisher NE, Warman AJ,  
469 Biagini GA, Ward SA, O'Neill PM. 2012. Identification, design and biological evaluation of bisaryl quinolones  
470 targeting *Plasmodium falciparum* type II NADH:quinone oxidoreductase (PfNDH2). *J Med Chem* 55:1831-43.
- 471 22. Leung SC, Gibbons P, Amewu R, Nixon GL, Pidathala C, Hong WD, Pacorel B, Berry NG, Sharma R, Stocks PA,  
472 Srivastava A, Shone AE, Charoensutthivarakul S, Taylor L, Berger O, Mbekeani A, Hill A, Fisher NE, Warman AJ,  
473 Biagini GA, Ward SA, O'Neill PM. 2012. Identification, design and biological evaluation of heterocyclic quinolones  
474 targeting *Plasmodium falciparum* type II NADH:quinone oxidoreductase (PfNDH2). *J Med Chem* 55:1844-57.
- 475 23. Sharma R, Lawrenson AS, Fisher NE, Warman AJ, Shone AE, Hill A, Mbekeani A, Pidathala C, Amewu RK, Leung S,  
476 Gibbons P, Hong DW, Stocks P, Nixon GL, Chadwick J, Shearer J, Gowers I, Cronk D, Parel SP, O'Neill PM, Ward  
477 SA, Biagini GA, Berry NG. 2012. Identification of novel antimalarial chemotypes via chemoinformatic compound  
478 selection methods for a high-throughput screening program against the novel malarial target, PfNDH2:  
479 increasing hit rate via virtual screening methods. *J Med Chem* 55:3144-54.
- 480 24. Yang Y, Yu Y, Li X, Li J, Wu Y, Yu J, Ge J, Huang Z, Jiang L, Rao Y, Yang M. 2017. Target Elucidation by Cocrystal  
481 Structures of NADH-Ubiquinone Oxidoreductase of *Plasmodium falciparum* (PfNDH2) with Small Molecule To  
482 Eliminate Drug-Resistant Malaria. *J Med Chem* 60:1994-2005.
- 483 25. Fisher N, Bray PG, Ward SA, Biagini GA. 2008. Malaria-parasite mitochondrial dehydrogenases as drug targets:  
484 too early to write the obituary. *Trends Parasitol* 24:9-10.
- 485 26. Vaidya AB, Painter HJ, Morrissey JM, Mather MW. 2008. The validity of mitochondrial dehydrogenases as  
486 antimalarial drug targets. *Trends Parasitol* 24:8-9.
- 487 27. Ke H, Morrissey JM, Ganesan SM, Painter HJ, Mather MW, Vaidya AB. 2011. Variation among *Plasmodium*  
488 *falciparum* strains in their reliance on mitochondrial electron transport chain function. *Eukaryot Cell* 10:1053-61.
- 489 28. Boysen KE, Matuschewski K. 2011. Arrested oocyst maturation in *Plasmodium* parasites lacking type II  
490 NADH:ubiquinone dehydrogenase. *J Biol Chem* 286:32661-71.

- 491 29. Lane KD, Mu J, Lu J, Windle ST, Liu A, Sun PD, Wellem TE. 2018. Selection of *Plasmodium falciparum*  
492 cytochrome B mutants by putative PfNDH2 inhibitors. *Proc Natl Acad Sci U S A* 115:6285-6290.
- 493 30. Spillman NJ, Beck JR, Ganesan SM, Niles JC, Goldberg DE. 2017. The chaperonin TRiC forms an oligomeric  
494 complex in the malaria parasite cytosol. *Cell Microbiol* 19.
- 495 31. Maier AG, Braks JA, Waters AP, Cowman AF. 2006. Negative selection using yeast cytosine deaminase/uracil  
496 phosphoribosyl transferase in *Plasmodium falciparum* for targeted gene deletion by double crossover  
497 recombination. *Mol Biochem Parasitol* 150:118-21.
- 498 32. Ke H, Dass S, Morrissey JM, Mather MW, Vaidya AB. 2018. The mitochondrial ribosomal protein L13 is critical for  
499 the structural and functional integrity of the mitochondrion in *Plasmodium falciparum*. *J Biol Chem*  
500 doi:10.1074/jbc.RA118.002552.
- 501 33. Mather MW, Morrissey JM, Vaidya AB. 2010. Hemozoin-free *Plasmodium falciparum* mitochondria for  
502 physiological and drug susceptibility studies. *Mol Biochem Parasitol* 174:150-3.
- 503 34. Trumpower BL, Edwards CA. 1979. Purification of a reconstitutively active iron-sulfur protein (oxidation factor)  
504 from succinate . cytochrome c reductase complex of bovine heart mitochondria. *J Biol Chem* 254:8697-706.
- 505 35. Fisher N, Warman AJ, Ward SA, Biagini GA. 2009. Chapter 17 Type II NADH: quinone oxidoreductases of  
506 *Plasmodium falciparum* and *Mycobacterium tuberculosis* kinetic and high-throughput assays. *Methods Enzymol*  
507 456:303-20.
- 508 36. van Dooren GG, Stimmler LM, McFadden GI. 2006. Metabolic maps and functions of the *Plasmodium*  
509 mitochondrion. *FEMS Microbiol Rev* 30:596-630.
- 510 37. Ganesan SM. 2011. Investigation of Mitochondrially Targeted Proteins in Blood Stage Malaria Parasites:PhD  
511 thesis. Drexel University College of Medicine, Philadelphia, PA.
- 512 38. Vallieres C, Fisher N, Antoine T, Al-Helal M, Stocks P, Berry NG, Lawrenson AS, Ward SA, O'Neill PM, Biagini GA,  
513 Meunier B. 2012. HDQ, a potent inhibitor of *Plasmodium falciparum* proliferation, binds to the quinone  
514 reduction site of the cytochrome bc1 complex. *Antimicrob Agents Chemother* 56:3739-47.
- 515 39. Biagini GA, Fisher N, Shone AE, Mubarak MA, Srivastava A, Hill A, Antoine T, Warman AJ, Davies J, Pidathala C,  
516 Amewu RK, Leung SC, Sharma R, Gibbons P, Hong DW, Pacorel B, Lawrenson AS, Charoensutthivarakul S, Taylor  
517 L, Berger O, Mbekeani A, Stocks PA, Nixon GL, Chadwick J, Hemingway J, Delves MJ, Sinden RE, Zeeman AM,  
518 Kocken CH, Berry NG, O'Neill PM, Ward SA. 2012. Generation of quinolone antimalarials targeting the  
519 *Plasmodium falciparum* mitochondrial respiratory chain for the treatment and prophylaxis of malaria. *Proc Natl*  
520 *Acad Sci U S A* 109:8298-303.
- 521 40. Phillips MA, Gujjar R, Malmquist NA, White J, El Mazouni F, Baldwin J, Rathod PK. 2008. Triazolopyrimidine-  
522 based dihydroorotate dehydrogenase inhibitors with potent and selective activity against the malaria parasite  
523 *Plasmodium falciparum*. *J Med Chem* 51:3649-53.
- 524 41. Dong CK, Patel V, Yang JC, Dvorin JD, Duraisingh MT, Clardy J, Wirth DF. 2009. Type II NADH dehydrogenase of  
525 the respiratory chain of *Plasmodium falciparum* and its inhibitors. *Bioorg Med Chem Lett* 19:972-5.
- 526 42. Smilkstein MJ, Forquer I, Kanazawa A, Kelly JX, Winter RW, Hinrichs DJ, Kramer DM, Riscoe MK. 2008. A drug-  
527 selected *Plasmodium falciparum* lacking the need for conventional electron transport. *Mol Biochem Parasitol*  
528 159:64-8.
- 529 43. Stocks PA, Barton V, Antoine T, Biagini GA, Ward SA, O'Neill PM. 2014. Novel inhibitors of the *Plasmodium*  
530 *falciparum* electron transport chain. *Parasitology* 141:50-65.
- 531 44. Zhang M, Wang C, Otto TD, Oberstaller J, Liao X, Adapa SR, Udenze K, Bronner IF, Casandra D, Mayho M, Brown  
532 J, Li S, Swanson J, Rayner JC, Jiang RHY, Adams JH. 2018. Uncovering the essential genes of the human malaria  
533 parasite *Plasmodium falciparum* by saturation mutagenesis. *Science* 360.
- 534 45. Fisher N, Abd Majid R, Antoine T, Al-Helal M, Warman AJ, Johnson DJ, Lawrenson AS, Ranson H, O'Neill PM,  
535 Ward SA, Biagini GA. 2012. Cytochrome b mutation Y268S conferring atovaquone resistance phenotype in  
536 malaria parasite results in reduced parasite bc1 catalytic turnover and protein expression. *J Biol Chem* 287:9731-  
537 41.
- 538 46. Goodman CD, Siregar JE, Mollard V, Vega-Rodriguez J, Syafruddin D, Matsuoka H, Matsuzaki M, Toyama T, Sturm  
539 A, Cozijnsen A, Jacobs-Lorena M, Kita K, Marzuki S, McFadden GI. 2016. Parasites resistant to the antimalarial  
540 atovaquone fail to transmit by mosquitoes. *Science* 352:349-53.

- 541 47. Stickles AM, Smilkstein MJ, Morrisey JM, Li Y, Forquer IP, Kelly JX, Pou S, Winter RW, Nilsen A, Vaidya AB, Riscoe  
542 MK. 2016. Atovaquone and ELQ-300 Combination Therapy as a Novel Dual-Site Cytochrome bc1 Inhibition  
543 Strategy for Malaria. *Antimicrob Agents Chemother* 60:4853-9.
- 544 48. Tuominen EK, Wallace CJ, Kinnunen PK. 2002. Phospholipid-cytochrome c interaction: evidence for the extended  
545 lipid anchorage. *J Biol Chem* 277:8822-6.

546

547

Figure 1. Disruption of the type II NADH dehydrogenase of *P. falciparum* does not affect growth in asexual blood stages.

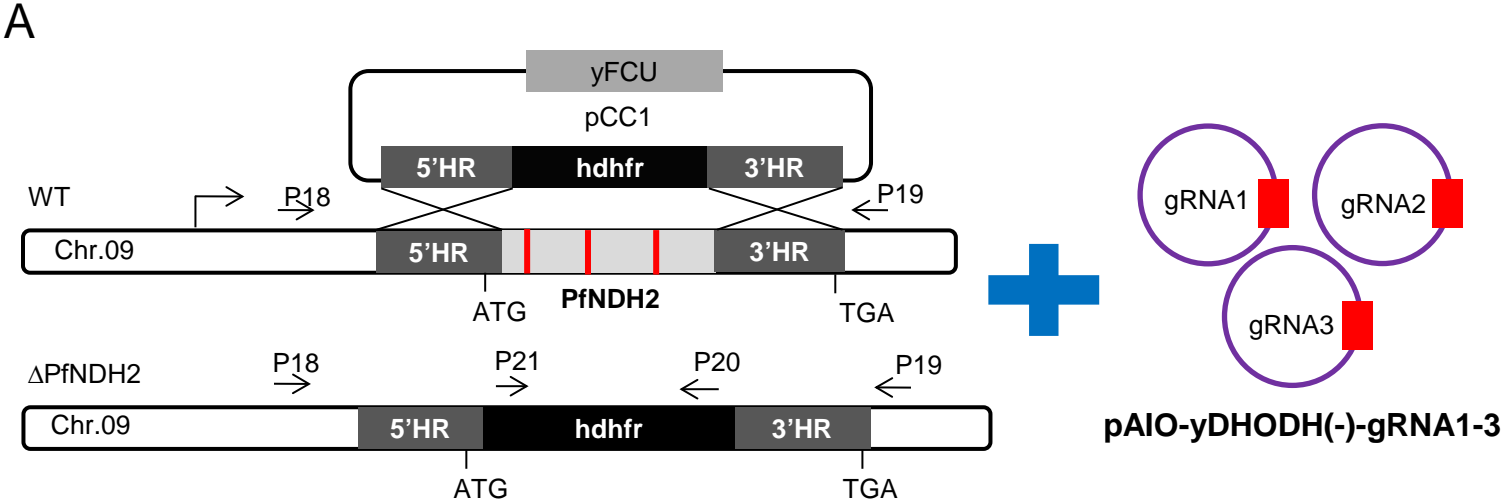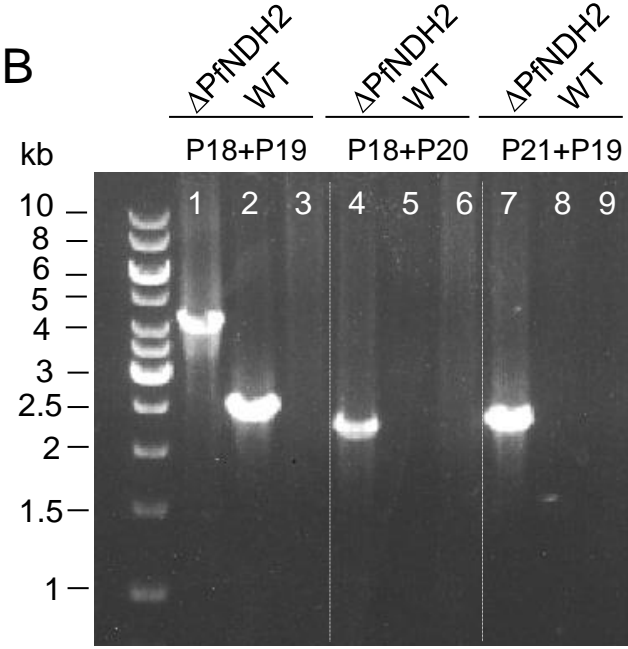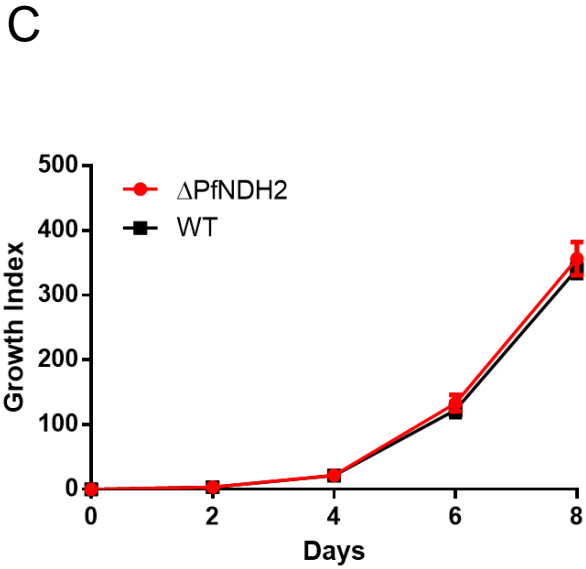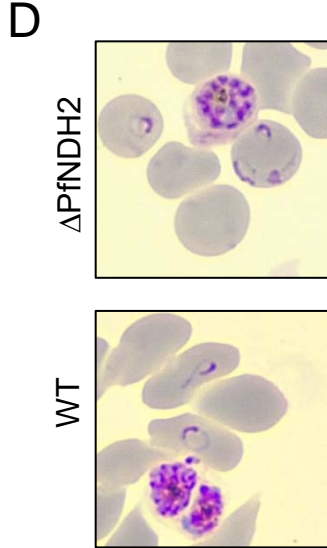

Figure 2. Deletion of PfNDH2 does not affect sensitivity to mitochondrial electron transport chain inhibitors.

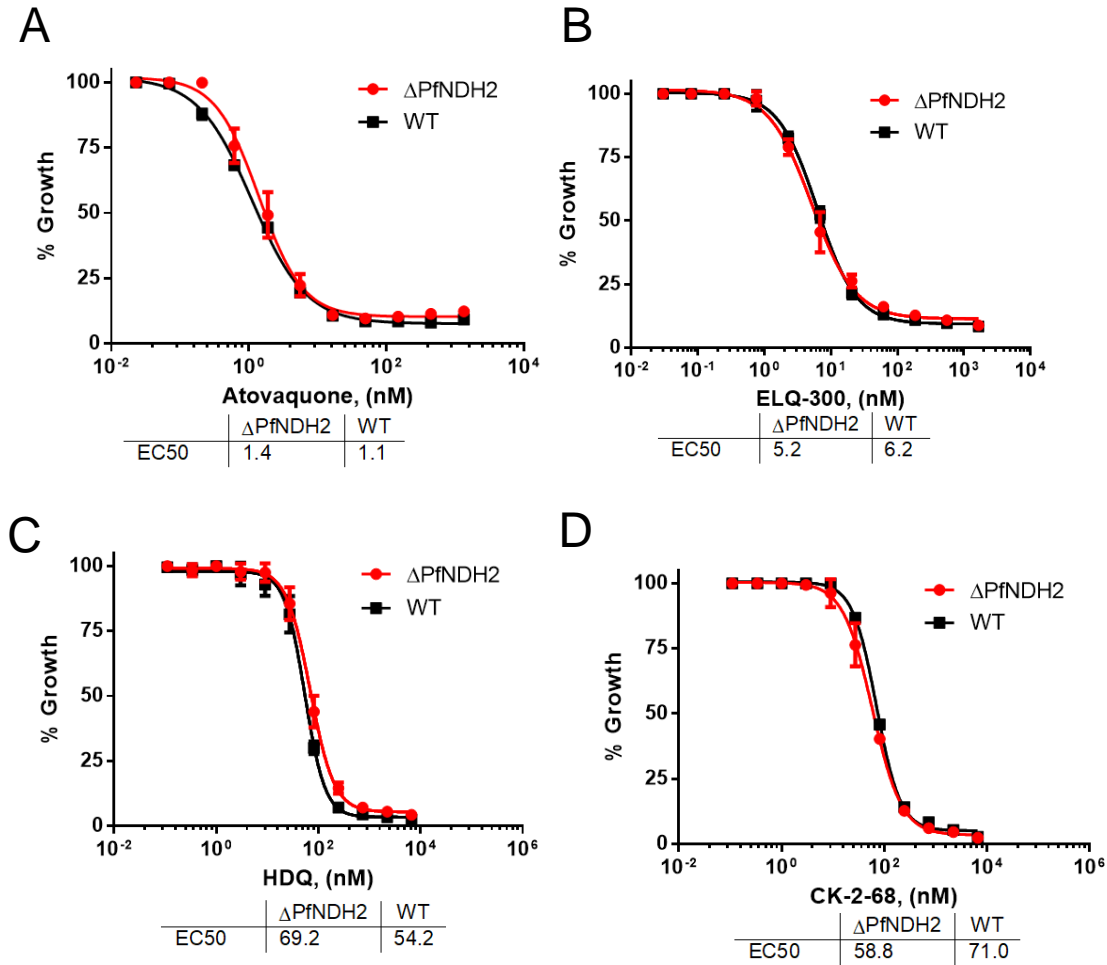

Figure 3. HDQ and CK-2-68 target the *bc*<sub>1</sub> complex.

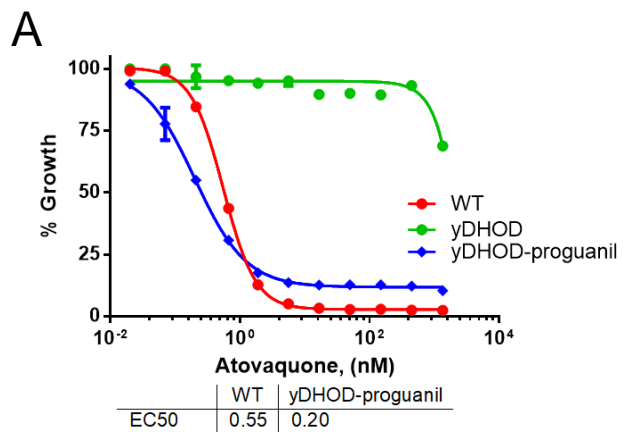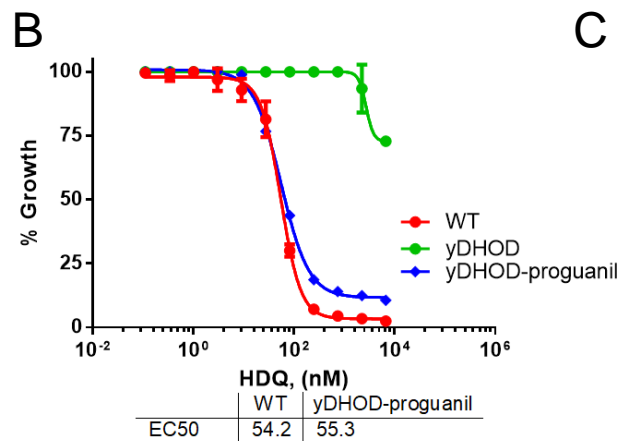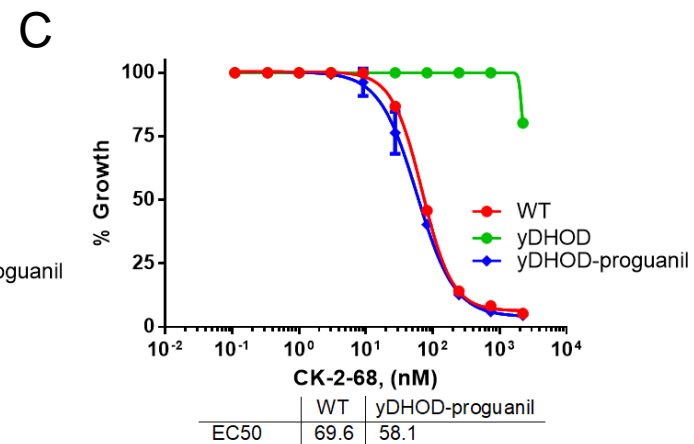

Figure 4. HDQ and CK-2-68 directly inhibit mitochondrial ubiquinol-cytochrome c reductase activity *in vitro*.

A

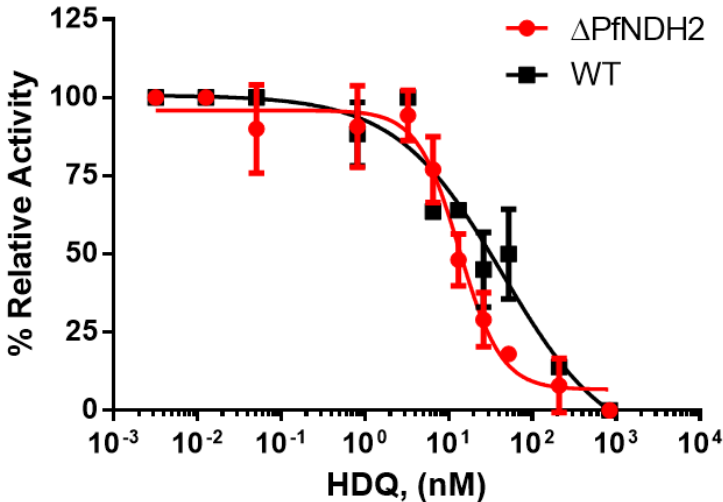

B

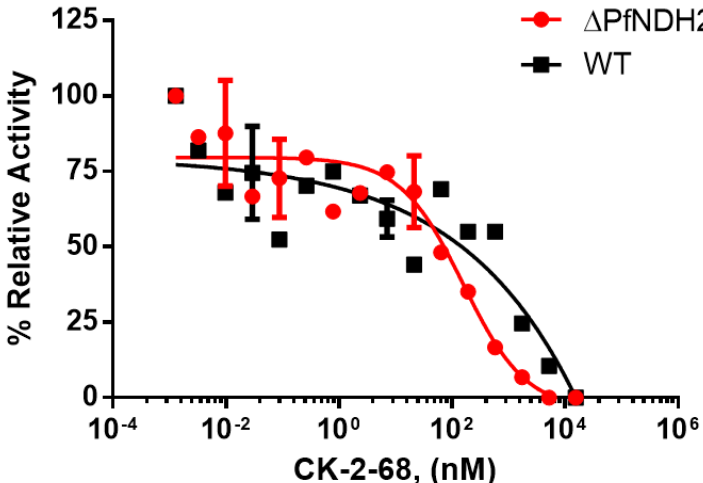

Figure 5. NADH-linked cytochrome c reductase activity in the *in vitro* assay is not dependent on PfNDH2 or mtETC.

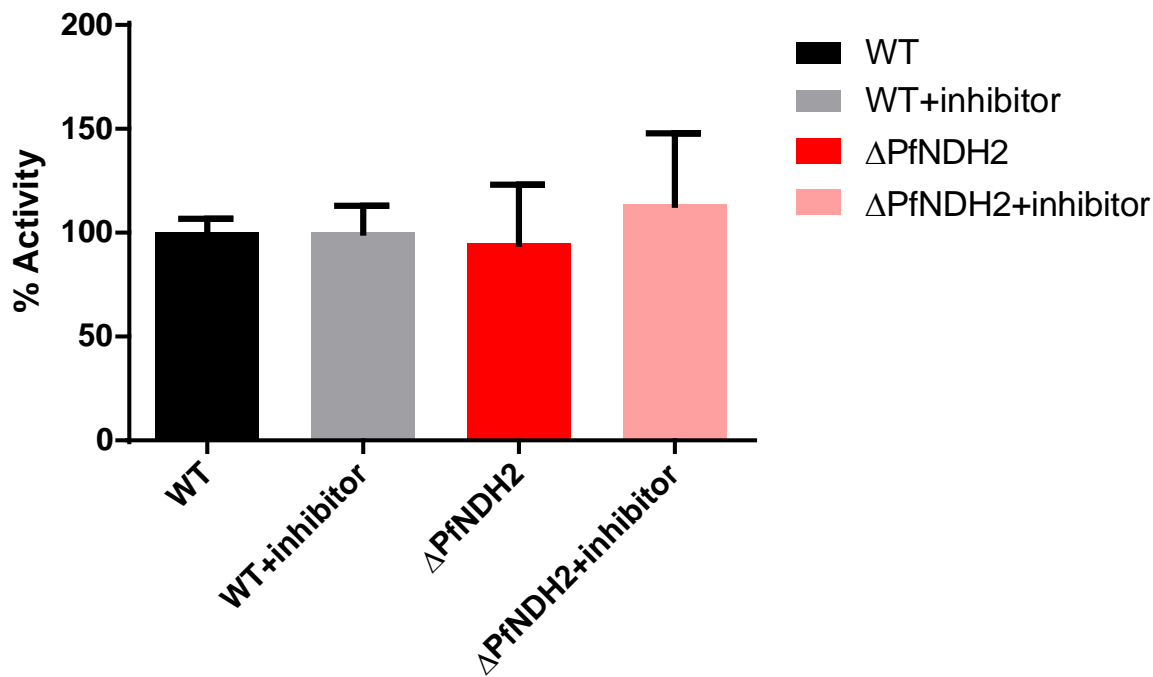

Source: https://www.biorxiv.org/content/10.1101/436881v1.full.pdf
